# Supplementary material
Source: PubMed Central journal article supplement (PMC3069677)
Supplement: supp_blood-2010-08-302034_Document1.pdf [file supp_blood-2010-08-302034_Document1.pdf]

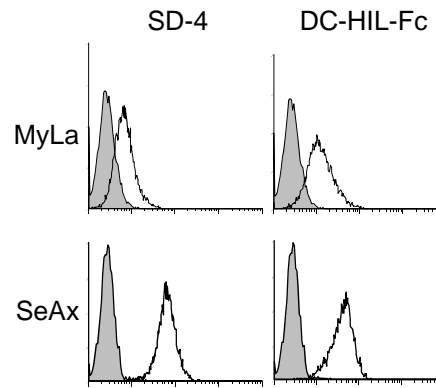

**Figure S1. Expression of SD-4 and DC-HIL binding by other CTCL lines**

MyLa or SeAx cells were examined by flow cytometry for expression of SD-4 and binding to DC-HIL-Fc. Control and experimental staining are represented as gray and open histograms, respectively.

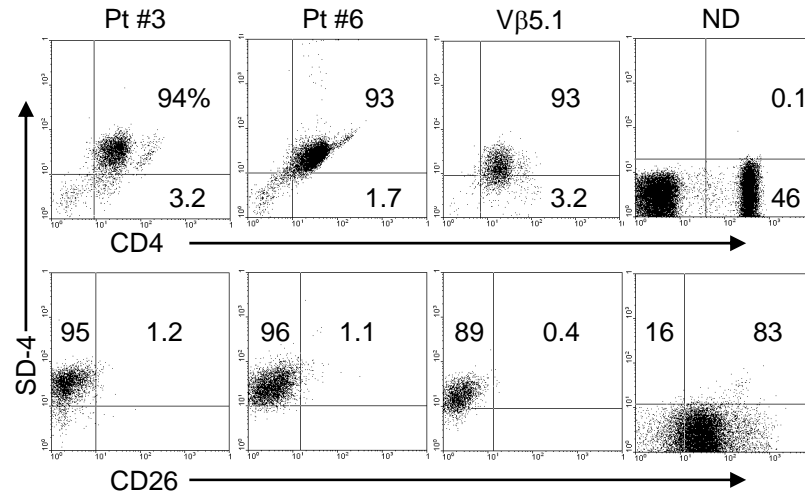

**Figure S2. SD-4 expression is confined to CD26<sup>+</sup>/CD4<sup>+</sup> cells in SS patients with high tumor burden**

PBMCs isolated from SS patients with high tumor burdens (Pt #3, Pt #6, and a patient with Vβ5.1) or a normal donor (ND) were stained with PE-anti-SD-4, FITC-anti-CD4, and APC-anti-CD26 Ab, and subjected to flow cytometric analysis. Top panels show expression of SD-4 vs. CD4, and bottom panels show expression of SD-4 vs. CD26 on CD4<sup>+</sup> cells (gated).

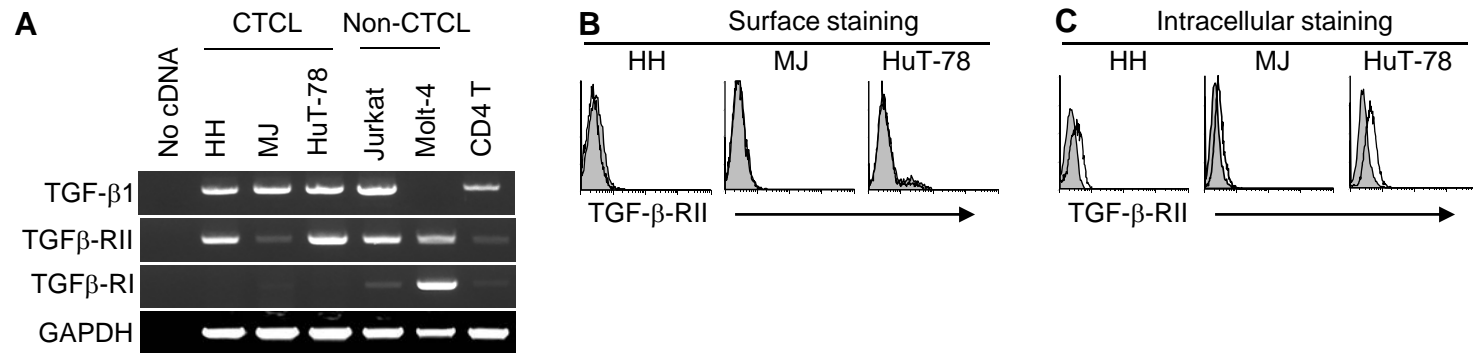

**Figure S3. No significant expression of type I and II TGF- $\beta$  receptors on CTCL lines**

(A) Total RNA isolated from CTCL lines (HH, MJ, and HuT-78), non-CTCL lines (Jurkat and Molt-4), or normal CD4<sup>+</sup> T cells activated *in vitro* (CD4 T) was examined by RT-PCR for expression of mRNA for TGF- $\beta$ 1, the type I (R-I) and II (R-II) receptors, and  $\beta$ -actin. (B and C) CTCL lines were untreated (B) or permeabilized (C) prior to staining with anti-TGF- $\beta$  RII Ab. Expression was measured by flow cytometry. All 3 CTCL cell lines did not express TGF- $\beta$  RI mRNA. MJ are negative for TGF- $\beta$  RII mRNA; HH and HuT-78 cells express TGF- $\beta$  RII mRNA, but not on the surface.

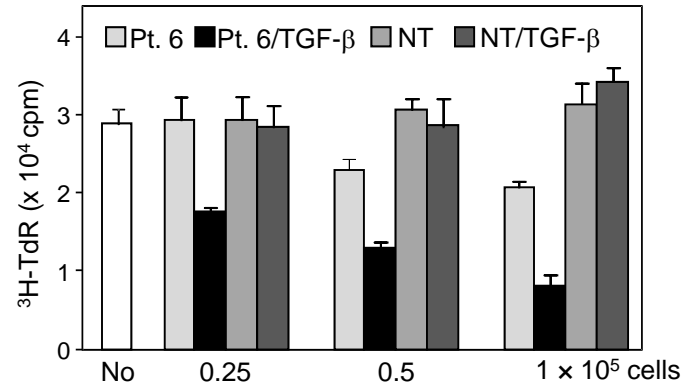

**Figure S4. TGF-β–treated normal CD4<sup>+</sup> T cells do not inhibit allogeneic anti-CD3 response**

Varying cell numbers of PBMCs from Pt #6 or normal CD4<sup>+</sup> T cells (NT) were incubated with/without TGF-β1, treated with mitomycin C, and co-cultured with CD4<sup>+</sup> T cells ( $2 \times 10^5$  cells) isolated from an allogeneic healthy donor in the presence of anti-CD3 Ab. After culturing for 3 d, T-cell activation was measured by <sup>3</sup>H-thymidine incorporation.

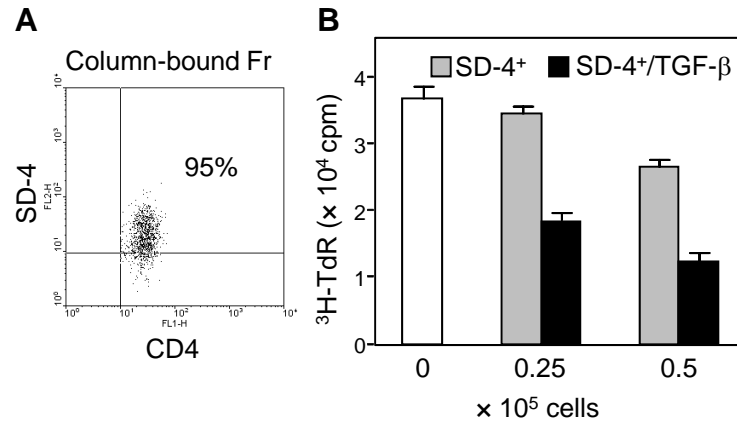

**Figure S5. TGF- $\beta$ -coating augments ability of SS cells to inhibit syngeneic anti-CD3 response**

CD4<sup>+</sup> T cells were isolated from PBMCs of Pt #7 containing CD4<sup>low</sup> and CD4<sup>high</sup> subpopulations (Fig. 1F), incubated with biotinylated anti-SD-4 Ab/streptavidin-beads, and then applied to a column. A column-pass through (SD-4<sup>-</sup>/CD4<sup>+</sup> T cells) and a column-bound (SD-4<sup>+</sup>/CD4<sup>+</sup>) fraction (Fr) was collected and analyzed by flow cytometry for expression of SD-4 and CD4. Data of column-bound fraction is shown (A). (B) SD-4<sup>+</sup>/CD4<sup>+</sup> cells were coated similarly with/without TGF- $\beta$ 1, treated with mitomycin C, and then co-cultured for 3 d with SD-4<sup>-</sup>/CD4<sup>+</sup> cells ( $2 \times 10^5$  cells/well, as responder) in the presence of anti-CD3 Ab (1  $\mu$ g/ml). Proliferation was measured by <sup>3</sup>H-thymidine incorporation.
